# Supplementary material
Source: PubMed Central journal article supplement (PMC327155)

GIRK4\*1229L+NK1R

1  $\mu$ M Substance P (~10 min)

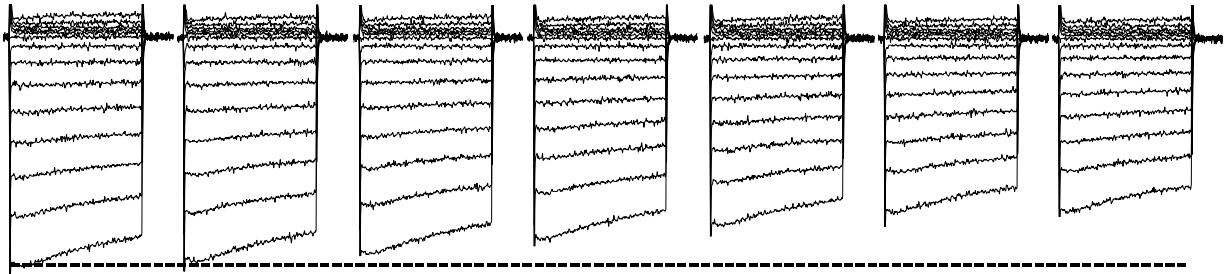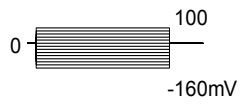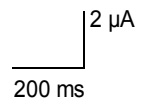

Supplement: pnas_0304827101_2.pdf [file pnas_0304827101_2.pdf]
